# Supplementary material for: Genetic Characterization of Methicillin-Resistant Staphylococcus aureus Isolates from Human Bloodstream Infections: Detection of MLSB Resistance
Source: PubMed Central journal article supplement (PMC7400445; doi:10.3390/antibiotics9070375), 2020-07-03
Supplement: antibiotics-09-00375-s001.pdf [file antibiotics-09-00375-s001.pdf]

**Table 1.** Primers used for molecular typing and detection of antimicrobial resistance genes in MRSA strains.

| Target gene                     | Primer sequence (5'-3')                                         | Amplicon size (bp) | Reference |
|---------------------------------|-----------------------------------------------------------------|--------------------|-----------|
| <b>Antimicrobial resistance</b> |                                                                 |                    |           |
| <i>mecA</i>                     | F: GGGATCATAGCGTCATTATTC<br>R: AACGATTGTGACACGATAGCC            | 527                | [1]       |
| <i>nuc</i>                      | F: TCAGCAAATGCATCACAAACAG<br>R: CGTAAATGCACTTGCTTCAGG           | 255                | [1]       |
| rDNA 16S                        | F: GTGCCAGCAGCCGCGGTAA<br>R: AGACCCGGGAACGTATTCAC               | 886                | [1]       |
| <i>blaZ</i>                     | F: CAGTTCACATGCCAAAGAG<br>R: TACTCTTGGCGGTTTC                   | 772                | [2]       |
| <i>erm(A)</i>                   | F: TCTAAAAAGCATGTAAAAGAA<br>R: CTTTCGATAGTTTATTAATATTAG         | 645                | [3]       |
| <i>erm(B)</i>                   | F: GAAAAGTACTCAACCAAATA<br>R: AGTAACGGTACTTAAATTGTTTA           | 639                | [3]       |
| <i>erm(C)</i>                   | F: TCAAAACATAATATAGATAAA<br>R: GCTAATATTGTTAAATCGTCAAT          | 642                | [3]       |
| <i>erm(T)</i>                   | F: CCGCCATTGAAATAGATCCT<br>R: TTCTGTAGCTGTGCTTTCAAAAA           | 200                | [4]       |
| <i>erm(Y)</i>                   | F: AGGCCCTTTTAAAGACGAAGGCA<br>R: GGCGCGATTGTTTCATTTTAAGGCC      | 320                | [4]       |
| <i>msr(A/B)</i>                 | F: GCAAATGGTGTAGGTAAGACAAC<br>R: ATCATGTGATGTAAACAAAA           | 399                | [5]       |
| <i>mph(C)</i>                   | F: ATGACTCGACATAATGAAAT<br>R: CTACTCTTTCATACCTAACTC             | 900                | [2]       |
| <i>lin(B)</i>                   | F: CCTACCTATTGTTTGTGGAA<br>R: ATAACGTTACTCTCCTATTTC             | 944                | [6]       |
| <i>vga(B)</i>                   | F: TGACAATATGAGTGGTGGTG<br>R: GCGACCATGAAATTGCTCTC              | 579                | [7]       |
| <i>vga(C)</i>                   | F: ACGAGGGGACAATCACGCCG<br>R: TTGGTCGTCGGTTCGTCTGC              | 159                | [4]       |
| <i>aac(6')-Ie-aph(2'')-Ia</i>   | F: CCAAGAGCAATAAGGGCATA<br>R: CACTATCATAACCACTACCG              | 220                | [8]       |
| <i>aph(3')-IIIa</i>             | F: GCCGATGTGGATTGCGAAAA<br>R: GCTTGATCCCCAGTAAGTCA              | 292                | [8]       |
| <i>ant(4')-Ia</i>               | F: GCAAGGACCGACAACATTTTC<br>R: TGGCACAGATGGTCATAACC             | 165                | [8]       |
| <i>fusB</i>                     | F: CTATAATGATATTAATGAGATTTTTGG<br>R: TTTTACATATTGACCATCCGAATTGG | 431                | [9]       |
| <i>fusC</i>                     | F: TTAAGAAAAAGATATTGATATCTCGG<br>R: TTTACAGAATCCTTTTACTTTATTTGG | 332                | [9]       |
| <b>Virulence</b>                |                                                                 |                    |           |
| <i>hla</i>                      | F: CTGATTACTATCCAAGAAATTCGATTG<br>R: CTTTCCAGCCTACTTTTTTATCAGT  | 209                | [10]      |
| <i>hlb</i>                      | F: GTGCACTTACTGACAATAGTGC                                       | 309                | [10]      |

|                         |                                      |          |      |
|-------------------------|--------------------------------------|----------|------|
|                         | R: GTTGATGAGTAGCTACCTTCAGT           |          |      |
|                         | F: ACTGTAGGAGCTAGTGCATTGT            |          |      |
| <i>eta</i>              | R: TGGATACTTTTGTCTATCTTTTTTCATCAAC   | 190      | [10] |
|                         | F: CAGATAAAGAGCTTTATACACACATTAC      |          |      |
| <i>etb</i>              | R: AGTGAACCTTATCTTTCTATTGAAAAAACACTC | 612      | [10] |
|                         | F: TTCACTATTTGTAAGGTGTCAGACCCACT     |          |      |
| <i>tst</i>              | R: TACTAATGAATTTTTTATCGTAAGCCCTT     | 180      | [10] |
|                         | F: ATCATTAGGTAAGGTGTCAGACCCACT       |          |      |
| <i>lukF/lukS-PV</i>     | R: GCATCAAGTGTATTGGATAGCAAAAAGC      | 443      | [11] |
|                         | F: ATCATTAGGTAAGGTGTCAGACCCACT       |          |      |
| <b>Molecular typing</b> |                                      |          |      |
|                         | F: AGACGATCCTTCGGTGAGC               |          |      |
| <i>spa</i>              | R: GCTTTGCAATGCATTTACTG              | Variable | [12] |
|                         | F: TTGATTCACCAGCGCGTATTGTC           |          |      |
| <i>arcC</i>             | R: AGGTATCTGCTTCAATCAGCG             | 456      | [13] |
|                         | F: ATCGGAAATCCTATTTTCACATTC          |          |      |
| <i>aroE</i>             | R: GGTGTTGTATTAATAACGATATC           | 456      | [13] |
|                         | F: CTAGGAAGTCAATCTTAATCC             |          |      |
| <i>glpF</i>             | R: TGGTAAAATCGCATGTCCAATTC           | 465      | [13] |
|                         | F: ATCGTTTTATCGGGACCATC              |          |      |
| <i>gmk</i>              | R: TCATTAACACTACAACGTAATCGTA         | 429      | [13] |
|                         | F: GTTAAAATCGTATTACCTGAAGG           |          |      |
| <i>pta</i>              | R: GACCCTTTTGTGAAAAGCTTAA            | 474      | [13] |
|                         | F: TCGTTCATTCTGAACGTCGTGAA           |          |      |
| <i>tpi</i>              | R: TTTGCACCTTCTAACAATTGTAC           | 402      | [13] |
|                         | F: CAGCATAACAGGACACCTATTGGC          |          |      |
| <i>yquiL</i>            | R: CGTTGAGGAATCGATACTGGAAC           | 516      | [13] |
|                         | F: GTCACAAGTACTATAAGCTGCGAT          |          |      |
| <i>agrI</i>             | R: ATGCACATGGTGCACATGC               | 440      | [14] |
|                         | F: GTATTACTAATTGAAAAGTGCCATAGC       |          |      |
| <i>agrII</i>            | R: ATGCACATGGTGCACATGC               | 572      | [14] |
|                         | F: CTGTTGAAAAAGTCAACTAAAAGCTC        |          |      |
| <i>agrIII</i>           | R: ATGCACATGGTGCACATGC               | 406      | [14] |
|                         | F: CGATAATGCCGTAATACCCG              |          |      |
| <i>agrIV</i>            | R: ATGCACATGGTGCACATGC               | 656      | [14] |
|                         | F: GCTTTAAAAGAGTGTCTGTTACAGG         |          |      |
| <i>SCCmec I</i>         | R: GTTCTCTCATAGTATGACGTCC            | 613      | [15] |
|                         | F: CGTTGAAAGATGATGAAGCG              |          |      |
| <i>SCCmec II</i>        | R: CGAAAATCAATGGTTAATGGACC           | 398      | [15] |
|                         | F: CCATATTGTGTACGATGCG               |          |      |
| <i>SCCmec III</i>       | R: CCTTAGTTGTGTAACAGATCG             | 280      | [15] |
|                         | F: GCCTTATTCTGAAGAAACCG              |          |      |
| <i>SCCmec IVa</i>       | R: CTACTCTTCTGAAAAGCGTCG             | 776      | [15] |
|                         | F: TCTGGAATTACTTCAGCTGC              |          |      |
| <i>SCCmec IVb</i>       | R: AAACAATATTGCTCTCCCTC              | 493      | [15] |
|                         | F: ACAATATTTGTATTATCGGAGAGC          |          |      |
| <i>SCCmec IVc</i>       | R: TTGGTATGAGGTATTGCTGG              | 200      | [15] |
|                         | F: CTCAAAAATACGGACCCCAATACA          |          |      |
| <i>SCCmec IVd</i>       | R: TGCTCCAGTAATTGCTAAAAG             | 881      | [15] |

## References

1. Zhang, K.; Sparling, J.; Chow, B.L.; Elsayed, S.; Hussain, Z.; Church, D.L.; Gregson, D.B.; Louie, T.; Conly, J.M. New quadriplex PCR assay for detection of methicillin and mupirocin resistance and simultaneous discrimination of *Staphylococcus aureus* from coagulase-negative staphylococci. *J. Clin. Microbiol.* **2004**, *42*, 4947–4955.
2. Schnellmann, C.; Gerber, V.; Rossano, A.; Jaquier, V.; Panchaud, Y.; Doherr, M.G.; Thomann, A.; Straub, R.; Perreten, V. Presence of New *mecA* and *mph(C)* Variants Conferring Antibiotic Resistance in *Staphylococcus* spp. Isolated from the Skin of Horses before and after Clinic Admission. *J. Clin. Microbiol.* **2006**, *44*, 4444–4454.
3. Sutcliffe, J.; Grebe, T.; Tait-Kamradt, A.; Wondrack, L. Detection of Rythromycin-Resistant Determinants by PCR. *Antimicrob. Agents Chemother.* **1996**, *40*, 2562–2566.
4. Gómez-Sanz, E.; Torres, C.; Lozano, C.; Fernández-Pérez, R.; Aspiroz, C.; Ruiz-Larrea, F.; Zarazaga, M. Detection, Molecular Characterization, and Clonal Diversity of Methicillin-Resistant *Staphylococcus aureus* CC398 and CC97 in Spanish Slaughter Pigs of Different Age Groups. *Foodborne Pathog. Dis.* **2010**, *7*, 1269–1277.
5. Wondrack, L.; Massa, M.; Yang, B. V.; Sutcliffe, J. Clinical strain of *Staphylococcus aureus* inactivates and causes efflux of macrolides. *Antimicrob. Agents Chemother.* **1996**, *40*, 992–998.
6. Bozdogan, B.; Berrezouga, L.; Kuo, M.S.; Yurek, D.A.; Farley, K.A.; Stockman, B.J.; Leclercq, R. A new resistance gene, *linB*, conferring resistance to lincosamides by nucleotidylation in *Enterococcus faecium* HM1025. *Antimicrob. Agents Chemother.* **1999**, *43*, 925–929.
7. Hammerum, A.M.; Jensen, L.B.; Aarestrup, F.M. Detection of the *satA* gene and transferability of virginiamycin resistance in *Enterococcus faecium* from food-animals. *FEMS Microbiol. Lett.* **1998**, *168*, 145–151.
8. Van de Klundert, J.A.M.; Vliegthart, J. PCR detection of genes coding for aminoglycoside-modifying enzymes. In *Diagnostic Molecular Microbiology: Principles and Applications*; Persing, D.H., Smith, T.F., Tenover, F.C., White, T.J., Eds.; American Society for Microbiology: Washington DC, 1993.
9. McLaws, F.; Chopra, I.; O'Neill, A.J. High prevalence of resistance to fusidic acid in clinical isolates of *Staphylococcus epidermidis*. *J. Antimicrob. Chemother.* **2008**, *61*, 1040–1043.
10. Jarraud, S.; Mougel, C.; Thioulouse, J.; Lina, G.; Meugnier, H.; Forey, F.; Etienne, J.; Vandenesch, F.; Nesme, X. Relationships between *Staphylococcus aureus* Genetic Background, Virulence Factors, *agr* Groups (Alleles), and Human Disease. *Infect. Immun.* **2002**, *70*, 631–641.
11. Lina, G.; Piemont, Y.; Godail-Gamot, F.; Bes, M.; Peter, M.-O.; Gauduchon, V.; Vandenesch, F.; Etienne, J. Involvement of Pantone-Valentine Leukocidin - Producing *Staphylococcus aureus* in Primary Skin Infections and Pneumonia. *Clin. Infect. Dis.* **1999**, *29*, 1128–1132.
12. Shopsin, B.; Gomez, M.; Montgomery, S.O.; Smith, D.H.; Waddington, M.; Dodge, D.E.; Bost, D.A.; Riehman, M.; Naidich, S.; Kreiswirth, B.N. Evaluation of protein A gene polymorphic region DNA sequencing for typing of *Staphylococcus aureus* strains. *J. Clin. Microbiol.* **1999**, *37*, 3556–3563.
13. Enright, M.C.; Day, N.P.; Davies, C.E.; Peacock, S.J.; Spratt, B.G. Multilocus sequence typing for characterization of methicillin-resistant and methicillin-susceptible clones of *Staphylococcus aureus*. *J. Clin. Microbiol.* **2000**, *38*, 1008–1015.
14. Shopsin, B.; Mathema, B.; Alcabes, P.; Said-Salim, B.; Lina, G.; Matsuka, A.; Martinez, J.; Kreiswirth, B.N. Prevalence of *agr* Specificity Groups among *Staphylococcus aureus* Strains Colonizing Children and Their Guardians. *J. Clin. Microbiol.* **2003**, *41*, 456 LP–459.
15. Zhang, K.; McClure, J.-A.; Elsayed, S.; Louie, T.; Conly, J.M. Novel Multiplex PCR Assay for Characterization and Concomitant Subtyping of Staphylococcal Cassette Chromosome *mec* Types I to V in Methicillin-Resistant *Staphylococcus aureus*; *J. Clin. Microbiol.* **2005**, *43*, 5026 LP–5033.
